# Supplementary material
Source: PubMed Central journal article supplement (PMC2825418)

**Supplemental figure legends.**

**Supplemental Figure 1. NF- $\kappa$ B activation induced by Pam<sub>3</sub>CSK<sub>4</sub> in the absence of sCD14.** Experiments were conducted as described in figure 2 except higher concentrations of Pam<sub>3</sub>CSK<sub>4</sub> in the absence of sCD14 were used. Only mutants that were defective in response to Pam<sub>3</sub>CSK<sub>4</sub>/sCD14 (○) were compared with wild-type (WT) (●) for responses to Pam<sub>3</sub>CSK<sub>4</sub> alone.

**Supplemental Figure 2. NF- $\kappa$ B activation induced by MALP-2 in 293 cells expressing TLR2 mutants.** Experiments were conducted as described in figure 5.

# Supplemental Figure 1

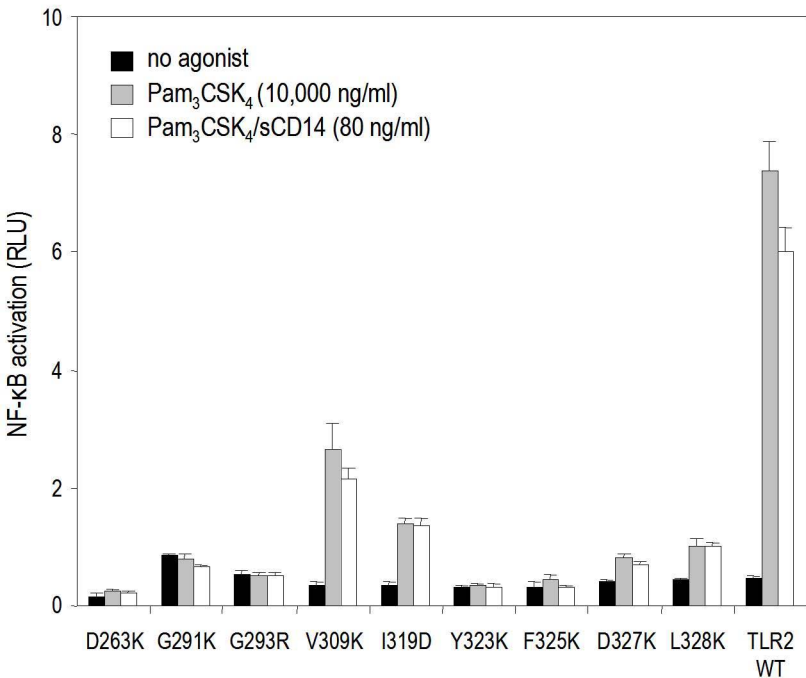

Supplemental Figure 2

NF- $\kappa$ B activation (RLU)

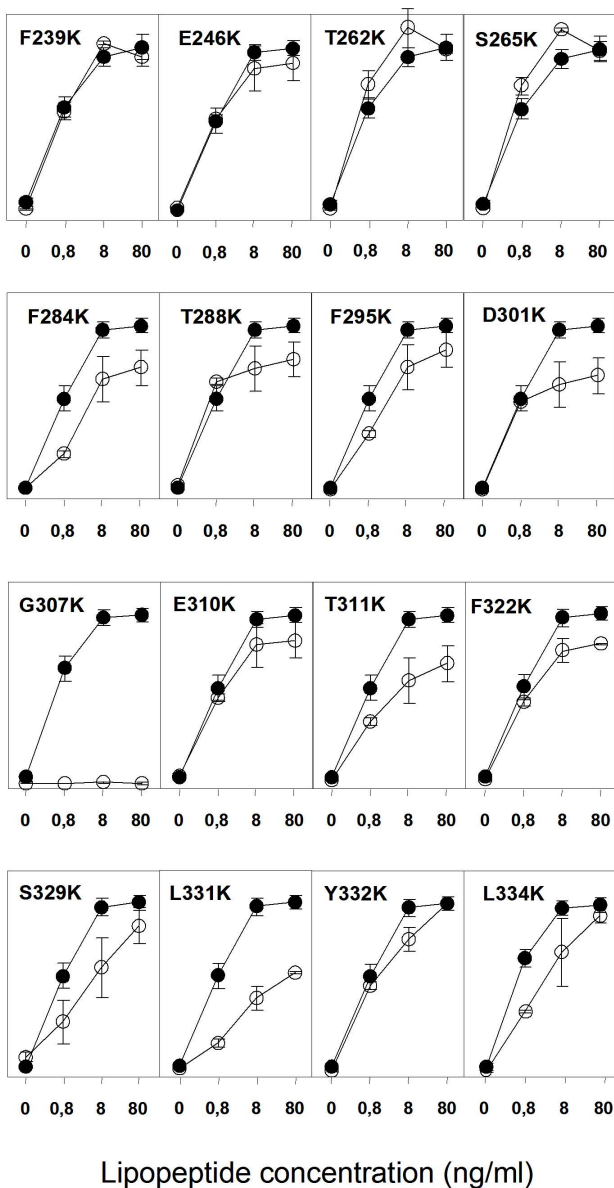

Supplement: supp_M109.063669_Binder3.pdf [file supp_M109.063669_Binder3.pdf]
